# Supplementary material for: Biomass production and nutrient uptake from cover crops in Brazilian agriculture
Source: Research Square preprint supplement (doi:10.21203/rs.3.rs-6787742/v1), 2025-06-17
Supplement: Supplementary file 1 [file 4343d32d473f74ffb3c5fd9e.docx]

**Supplementary material**

**Table S1** - Genera of plants used in the studies included in the systematic literature review, with taxonomic family, mean values of biomass and nutrient uptake, and number of unique studies.

| Botanical family | Genera |  | Mean Biomass |  | Mean K uptake | Mean N uptake | Mean P uptake |  | Unique studies |
| --- | --- | --- | --- | --- | --- | --- | --- | --- | --- |
|  | *(Mg ha-1)* |  | *(kg ha-1)* | | |  |
| Amaranthaceae | Amaranthus |  | 4.80 |  | - | - | - |  | 4 |
| Fabaceae | Arachis |  | 3.46 |  | 75.57 | 123.89 | 19.84 |  | 2 |
| Poaceae | Avena |  | 4.18 |  | 100.95 | 69.11 | 15.97 |  | 43 |
| Fabaceae | Cajanus |  | 6.00 |  | 93.12 | 154.90 | 14.70 |  | 53 |
| Fabaceae | Calopogonium |  | 3.36 |  | - | 53.09 | - |  | 1 |
| Fabaceae | Canavalia |  | 5.88 |  | 72.45 | 142.32 | 16.00 |  | 33 |
| Poaceae | Cenchrus |  | 7.10 |  | 128.89 | 102.98 | 20.03 |  | 91 |
| Amaranthaceae | Chenopodium |  | 6.20 |  | - | - | - |  | 1 |
| Fabaceae | Clitoria |  | 6.76 |  | - | 108.84 | - |  | 1 |
| Brassicaceae | Crambe |  | 2.69 |  | - | - | - |  | 1 |
| Fabaceae | Crotalaria |  | 6.53 |  | 111.55 | 132.49 | 16.67 |  | 115 |
| Fabaceae | Dolichos |  | 3.60 |  | 42.98 | 82.32 | 6.68 |  | 12 |
| Poaceae | Eleusine |  | 7.52 |  | 174.59 | 158.53 | 34.79 |  | 5 |
| Polygo-ceae | Fagopyrum |  | 1.92 |  | - | - | - |  | 5 |
| Asteraceae | Helianthus |  | 6.11 |  | 120.29 | 50.66 | 17.47 |  | 13 |
| Poaceae | Hordeum |  | 5.50 |  | - | - | - |  | 1 |
| Fabaceae | Lablab |  | 8.66 |  | - | 433.87 | - |  | 1 |
| Fabaceae | Lathyrus |  | 1.65 |  | - | 48.15 | - |  | 4 |
| Poaceae | Lollium |  | 3.09 |  | - | 38.12 | - |  | 12 |
| Fabaceae | Lupinus |  | 4.11 |  | 111.00 | 108.40 | 27.50 |  | 28 |
| Fabaceae | Macroptilium |  | 5.38 |  | - | 75.86 | - |  | 1 |
| Poaceae | Megathyrsus |  | 4.44 |  | - | 58.16 | - |  | 1 |
| Fabaceae | Mucuna |  | 4.84 |  | 95.92 | 119.35 | 15.65 |  | 37 |
| Fabaceae | Ornithopus |  | 1.18 |  | - | 19.73 | - |  | 4 |
| Poaceae | Panicum |  | 4.09 |  | 77.08 | 69.24 | 8.81 |  | 4 |
| Fabaceae | Pueraria |  | 7.58 |  | - | 143.26 | - |  | 1 |
| Brassicaceae | Raphanus |  | 3.88 |  | 51.39 | 79.68 | 4.80 |  | 38 |
| Poaceae | Secale |  | 4.53 |  | - | 77.70 | - |  | 12 |
| Pedaliaceae | Sesamum |  | 2.97 |  | - | - | - |  | 3 |
| Poaceae | Setaria |  | 6.50 |  | - | 136.50 | 43.55 |  | 1 |
| Poaceae | Sorghum |  | 10.61 |  | 190.38 | 183.00 | 51.63 |  | 60 |
| Fabaceae | Stizolobium |  | 4.72 |  | 58.77 | 109.73 | 7.42 |  | 9 |
| Fabaceae | Tephrosia |  | 7.25 |  | - | - | - |  | 1 |
| Asteraceae | Tithonia |  | 7.50 |  | - | - | - |  | 1 |
| Fabaceae | Trifolium |  | 2.17 |  | - | 61.50 | - |  | 13 |
| Poaceae | Triticum |  | 4.09 |  | - | 12.39 | - |  | 6 |
| Poaceae | Urochloa |  | 6.28 |  | 112.47 | 110.09 | 17.25 |  | 77 |
| Fabaceae | Vicia |  | 2.87 |  | - | 73.41 | - |  | 18 |
| Fabaceae | Vigma |  | 2.23 |  | 17.00 | 27.00 | 2.40 |  | 1 |
| Poaceae | Zea |  | 9.35 |  | 223.66 | 156.64 | 18.58 |  | 5 |
